# Supplementary material for: Orange Carotenoid Protein in Mesoporous Silica: A New System towards the Development of Colorimetric and Fluorescent Sensors for pH and Temperature
Source: MDPI journal article supplement (doi:10.3390/mi14101871), 2023-09-29
Supplement: s1 [file s1]

## **Orange Carotenoid Protein in Mesoporous Silica: A New System towards the Development of Colorimetric and Fluorescent Sensors for pH and Temperature**

Silvia Leccese, Andrea Calcinoni, Adjélé Wilson, Diana Kirilovsky, Donatella Carbonera, Thomas Onfroy, Claude Jolivald and Alberto Mezzetti

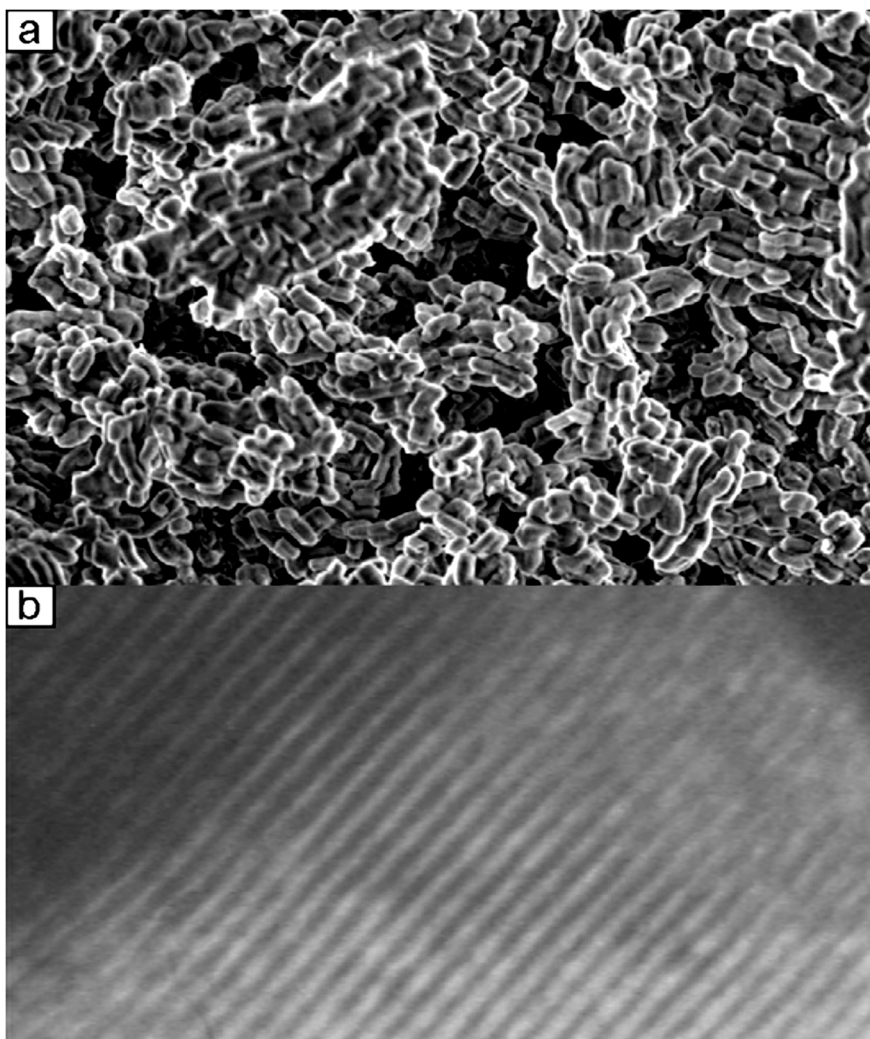

**Figure S1.** Morphological and structural characterization of mesoporous silica (SBA-15). **(a)** SEM image of the rod-like particles. **(b)** TEM image of the internal hexagonal mesostructure.

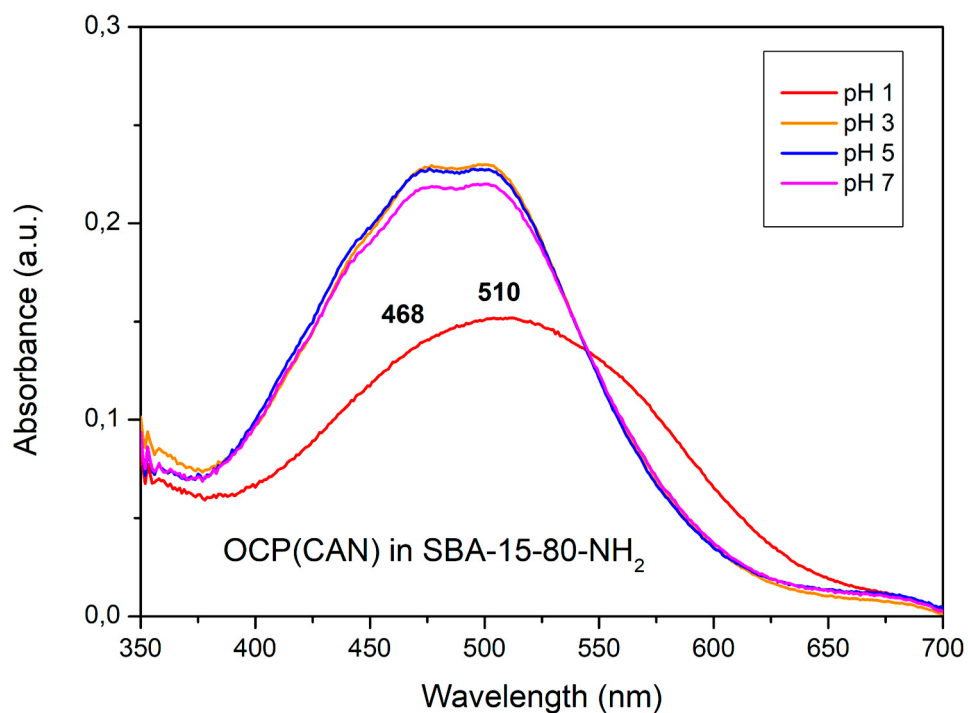

**Figure S2.** Vis spectra of OCP(CAN) in SBA-15-80-NH<sub>2</sub> in the pH 1-7 range. Experiments were carried out as follows: 10 mg of OCP-loaded silica nanoparticles were added to 1 mL of solution at a given pH. The obtained suspension was stirred for 30 minutes. After centrifugation, the obtained pellet was analysed by UV-Vis spectroscopy.

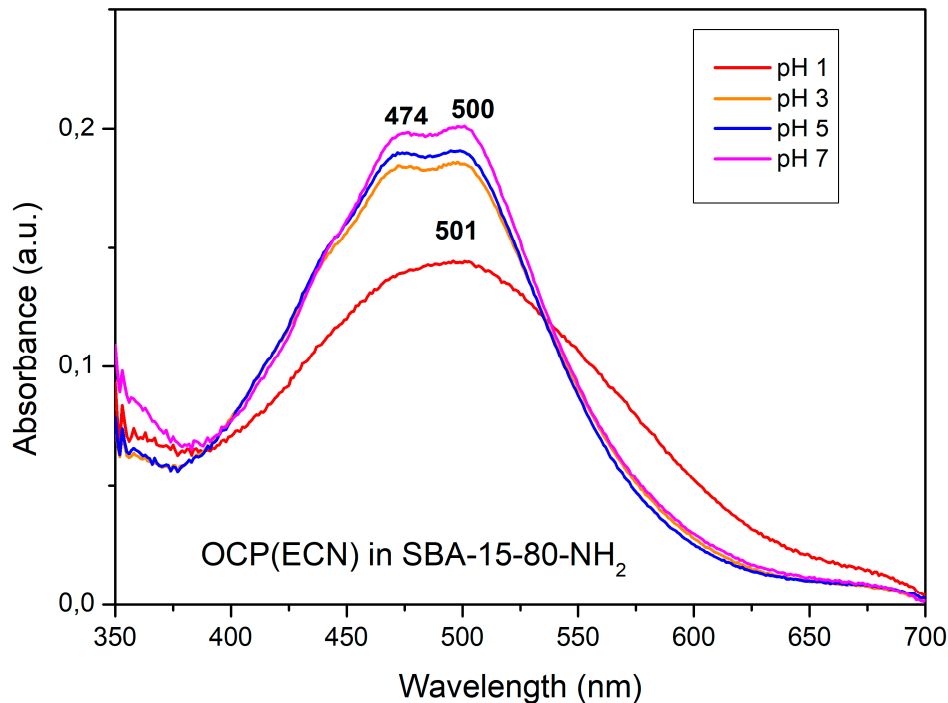

**Figure S3.** Vis spectra of OCP(ECN) in SBA-15-80-NH<sub>2</sub> in the pH 1-7 range. Experiments were carried out as follows: 10 mg of OCP-loaded silica nanoparticles were added to 1 mL of solution at a given pH. The obtained suspension was stirred for 30 minutes. After centrifugation, the obtained pellet was analysed by UV-Vis spectroscopy.
